# Supplementary material
Source: publisher figshare collection journal article supplement (https://rs.figshare.com/ndownloader/files/17379773)
Supplement: Supplementary file 1 [file 17379773]

Supplementary Material for the manuscript
EXPERIMENTALLY DISENTANGLING INTRINSIC AND EXTRINSIC DRIVERS OF NATAL DISPERSAL IN A NOCTURNAL RAPTOR
By Julien Fattebert, Marco Perrig, Beat Naef-Daenzer, Martin U. Gr�ebler
Published in Proceedings B, doi 10.1098/rspb.2019.1537
******************************************************************************************************************************
Dispersal parameters of juvenile little owls
******************************************************************************************************************************
ring	sex	date_hatch	JulianD_hatch	year_hatch	fed	cross_fpstered	fam_hatch	fam_foster	x_box_foster	y_box_foster	HSI_foster	dateforay	ageforay	duraforay	dateemigr	ageemigr	transfer	duratrans	datesettle	agesettle	x_settle	y_settle	net_dist	mass	r.mass
HF-46382	f	6/3/2009	154	2009	unfed	not_crossed	2009RW007	2009RW007	3495303	5421141	0.931395349	8/18/2009	76	9	8/27/2009	85	NA	NA	NA	NA	NA	NA	NA	142	3.026621411
HF-46383	f	6/4/2009	155	2009	unfed	not_crossed	2009RW007	2009RW007	3495303	5421141	0.761046512	8/13/2009	70	40	9/22/2009	110	completed	4	26.09.2009	114	3499844.75	5409677	12331	140	-12.87985296
HF-46425	f	5/17/2009	137	2009	unfed	not_crossed	2009KS033	2009KS033	3505838	5426452	0.761046512	8/4/2009	79	55	9/28/2009	134	NA	NA	NA	NA	NA	NA	NA	NA	NA
HF-46426	f	5/21/2009	141	2009	unfed	not_crossed	2009KS007	2009KS007	3505283	5426792	0.761046512	7/8/2009	48	0	7/8/2009	45	NA	NA	NA	NA	NA	NA	NA	166	-24.75515212
HF-46493	m	5/23/2009	143	2009	unfed	not_crossed	2009BI001	2009BI001	3509202	5425758	0.830057803	8/5/2009	74	104	11/17/2009	178	NA	NA	NA	NA	NA	NA	NA	144	-5.599276063
HF-46495	m	5/26/2009	146	2009	unfed	not_crossed	2009BI006	2009BI006	3508654	5425805	0.830057803	9/5/2009	102	137	1/20/2010	239	NA	NA	NA	NA	NA	NA	NA	132	-18.69280169
HF-46497	m	5/26/2009	146	2009	unfed	not_crossed	2009KS010	2009KS010	3504225	5427187	0.830057803	10/2/2009	129	4	10/6/2009	133	completed	10	16.10.2009	143	3504886.25	5415697	11509	127	15.15132225
HF-46499	f	5/24/2009	144	2009	unfed	not_crossed	2009KS014	2009KS014	3504721	5426918	0.896551724	7/24/2009	61	67	9/29/2009	128	completed	13	12.10.2009	141	3480663.75	5424882.5	24143	119	1.088971832
HF-46804	f	5/19/2009	139	2009	unfed	not_crossed	2009KS021	2009KS021	3504617	5426201	0.896551724	8/3/2009	76	44	9/16/2009	120	completed	12	28.09.2009	132	3498290	5421553.5	7850	143	-1.835729011
HF-46806	f	5/20/2009	140	2009	unfed	not_crossed	2009KS021	2009KS021	3504617	5426201	0.896551724	8/3/2009	75	36	9/8/2009	111	completed	16	24.09.2009	127	3501054.75	5422506	5133	127	-10.53572901
HF-64502	f	5/10/2010	130	2010	fed	crossed	2010MG106	2010HE102	3503494	5413665	0.998275862	6/20/2010	42	0	6/20/2010	34	NA	NA	NA	NA	NA	NA	NA	141	-0.742203379
HF-64503	m	5/11/2010	131	2010	fed	crossed	2010MG106	2010HE102	3503494	5413665	0.998275862	8/8/2010	89	10	8/18/2010	99	NA	NA	NA	NA	NA	NA	NA	136	-19.97337859
HF-64504	f	5/8/2010	128	2010	fed	not_crossed	2010HE102	2010HE102	3503494	5413665	0.999431818	6/29/2010	53	0	6/29/2010	40.5	NA	NA	NA	NA	NA	NA	NA	137	-3.042203379
HF-64505	f	5/6/2010	126	2010	fed	not_crossed	2010MU104	2010MU104	3507674	5413368	0.794350282	8/26/2010	112	22	9/17/2010	134	completed	8	25.09.2010	142	3519349.5	5414016.5	11693	156	-4.611028168
HF-64507	f	5/7/2010	127	2010	fed	not_crossed	2010MU104	2010MU104	3507674	5413368	0.794350282	8/26/2010	111	41	10/6/2010	152	NA	NA	NA	NA	NA	NA	NA	167	-9.235729011
HF-64544	m	5/14/2010	134	2010	fed	not_crossed	2010GB085	2010GB085	3521433	5431155	0.725433526	8/18/2010	96	33	9/20/2010	129	NA	NA	NA	NA	NA	NA	NA	154	-9.879852958
HF-64545	f	5/17/2010	137	2010	fed	crossed	2010OT096	2010GB085	3521433	5431155	0.844508671	8/23/2010	98	40	10/2/2010	138	NA	NA	NA	NA	NA	NA	NA	130.1	-3.735729011
HF-64546	f	5/13/2010	133	2010	fed	not_crossed	2010GB085	2010GB085	3521433	5431155	0.844508671	8/3/2010	82	67	10/9/2010	149	completed	24	02.11.2010	173	3496578	5428042.5	25049	140	21.42014704
HF-64547	f	5/17/2010	137	2010	fed	crossed	2010OT096	2010GB085	3521433	5431155	0.844508671	9/7/2010	113	11	9/18/2010	124	completed	8	26.09.2010	132	3517719.75	5430345	3801	133.2	12.32662141
HF-64548	m	5/18/2010	138	2010	unfed	not_crossed	2010OT096	2010OT096	3515938	5431458	0.968208092	8/3/2010	77	48	9/20/2010	125	completed	8	28.09.2010	133	3517555	5426309.5	5396	124.5	-5.842203379
HF-64549	m	5/15/2010	135	2010	unfed	crossed	2010GB085	2010OT096	3515938	5431458	0.968208092	7/28/2010	74	23	8/20/2010	97	completed	14	03.09.2010	111	3505014.5	5434546	11352	137.2	-12.51102817
HF-64550	f	5/15/2010	135	2010	unfed	crossed	2010GB085	2010OT096	3515938	5431458	0.968208092	8/1/2010	78	29	8/30/2010	107	NA	NA	NA	NA	NA	NA	NA	130.5	0.626621411
HF-64555	m	5/10/2010	130	2010	unfed	not_crossed	2010MG106	2010MG106	3507826	5417050	0.995348837	8/20/2010	102	0	8/20/2010	101	completed	28	17.09.2010	129	3509871.75	5416110	2251	117	-1.273378589
HF-64558	m	5/14/2010	134	2010	unfed	not_crossed	2010AL041	2010AL041	3517360	5414310	0.816763006	9/11/2010	120	28	10/9/2010	148	NA	NA	NA	NA	NA	NA	NA	110.3	-6.3045538
HF-64559	f	5/13/2010	133	2010	unfed	not_crossed	2010AL041	2010AL041	3517360	5414310	0.816763006	8/24/2010	103	113	12/15/2010	216	NA	NA	NA	NA	NA	NA	NA	125.5	1.620147042
HF-64630	m	5/14/2010	134	2010	fed	not_crossed	2010AL040	2010AL040	3516948	5413576	0.816763006	9/4/2010	113	134	1/16/2011	247	NA	NA	NA	NA	NA	NA	NA	135.1	-4.179852958
HF-64632	f	5/14/2010	134	2010	fed	crossed	2010AL041	2010AL040	3516948	5413576	0.816763006	9/15/2010	124	56	11/10/2010	180	completed	10	20.11.2010	190	3518699	5417330.5	4143	134.9	5.651322253
HF-64644	f	5/19/2010	139	2010	fed	crossed	2010GB083	2010OT099	3514249	5431906	0.566666667	8/22/2010	95	29	9/20/2010	124	completed	6	26.09.2010	130	3518597.25	5431088.5	4424	134.3	12.82014704
HF-64648	f	5/19/2010	139	2010	unfed	not_crossed	2010OT097	2010OT097	3514899	5431806	0.566666667	6/18/2010	30	0	6/18/2010	26	NA	NA	NA	NA	NA	NA	NA	121.1	-30.41102817
HF-64649	f	5/15/2010	135	2010	unfed	crossed	2010GB086	2010OT097	3514899	5431806	0.854857143	8/17/2010	94	34	9/20/2010	128	NA	NA	NA	NA	NA	NA	NA	142.3	-26.27985296
HF-64650	m	5/17/2010	137	2010	unfed	not_crossed	2010OT097	2010OT097	3514899	5431806	0.896551724	8/21/2010	96	30	9/20/2010	126	completed	5	25.09.2010	131	3510824	5442331	11286	125.8	2.657796621
HF-64677	f	5/17/2010	137	2010	fed	not_crossed	2010KS014	2010KS014	3504721	5426918	0.854857143	8/11/2010	86	57	10/7/2010	143	NA	NA	NA	NA	NA	NA	NA	151	25.92662141
HF-64678	f	5/17/2010	137	2010	fed	crossed	2010KS020	2010KS014	3504721	5426918	0.854857143	8/25/2010	100	43	10/7/2010	143	completed	16	23.10.2010	159	3504968.25	5420374	6549	130	-1.342203379
HF-64679	f	5/19/2010	139	2010	fed	not_crossed	2010KS014	2010KS014	3504721	5426918	0.854857143	9/12/2010	116	11	9/23/2010	127	NA	NA	NA	NA	NA	NA	NA	162	7.557796621
HF-64681	m	5/16/2010	136	2010	fed	not_crossed	2010SC009	2010SC009	3503112	5415865	0.854857143	8/9/2010	85	65	10/13/2010	150	NA	NA	NA	NA	NA	NA	NA	162.8	-8.148677747
HF-64682	m	5/19/2010	139	2010	fed	crossed	2010SC008	2010SC009	3503112	5415865	0.868604651	8/12/2010	85	51	10/2/2010	136	completed	1	03.10.2010	137	3504004	5418695.5	2968	131.3	-2.673378589
HF-64683	f	5/17/2010	137	2010	fed	not_crossed	2010SC009	2010SC009	3503112	5415865	0.868604651	8/21/2010	96	18	9/8/2010	114	completed	20	28.09.2010	134	3510457.25	5442442	27573	161.3	20.05132225
HF-64684	f	5/17/2010	137	2010	fed	not_crossed	2010SC009	2010SC009	3503112	5415865	0.868604651	9/2/2010	108	17	9/19/2010	125	completed	7	26.09.2010	132	3503136	5411487.5	4378	149.3	7.351322253
HF-64685	f	5/19/2010	139	2010	fed	crossed	2010SC008	2010SC009	3503112	5415865	0.958381503	9/6/2010	110	37	10/13/2010	147	NA	NA	NA	NA	NA	NA	NA	135.1	13.42014704
HF-64686	m	5/19/2010	139	2010	unfed	crossed	2010SC009	2010SC008	3503413	5415778	0.917045455	7/31/2010	73	85	10/24/2010	158	NA	NA	NA	NA	NA	NA	NA	134.4	9.588971832
HF-64716	m	5/15/2010	135	2010	fed	crossed	2010OT097	2010GB086	3521026	5430793	0.917045455	8/22/2010	99	40	10/1/2010	139	NA	NA	NA	NA	NA	NA	NA	149.2	-4.779852958
HF-64717	m	5/24/2010	144	2010	fed	crossed	2010VA021	2010GB090	3518897	5431144	0.917045455	8/4/2010	72	24	8/28/2010	96	NA	NA	NA	NA	NA	NA	NA	115.5	-8.492801694
HF-64719	m	5/22/2010	142	2010	fed	not_crossed	2010GB090	2010GB090	3518897	5431144	0.917045455	8/4/2010	74	31	9/4/2010	105	NA	NA	NA	NA	NA	NA	NA	138	0.082497463
HF-64720	m	5/22/2010	142	2010	fed	not_crossed	2010GB090	2010GB090	3518897	5431144	0.917045455	8/4/2010	74	41	9/14/2010	115	NA	NA	NA	NA	NA	NA	NA	127.1	-13.65515212
HF-64723	f	5/24/2010	144	2010	unfed	crossed	2010GB090	2010VA021	3498583	5421523	0.723033708	8/18/2010	86	174	2/8/2011	260	NA	NA	NA	NA	NA	NA	NA	124.2	-7.536925641
HF-64724	f	5/22/2010	142	2010	unfed	crossed	2010BI006	2010RW007	3495303	5421141	0.723033708	8/4/2010	74	9	8/13/2010	83	NA	NA	NA	NA	NA	NA	NA	118.2	-0.979852958
HF-64726	m	5/21/2010	141	2010	unfed	crossed	2010BI006	2010RW007	3495303	5421141	0.723033708	9/10/2010	112	47	10/27/2010	159	NA	NA	NA	NA	NA	NA	NA	101.7	1.776023095
HF-64727	f	5/15/2010	135	2010	fed	crossed	2010HE101	2010HD749	3499136	5413229	0.932	9/3/2010	111	7	9/10/2010	118	completed	10	20.09.2010	128	3506686	5422835	12218	132.1	-0.686327326
HF-64728	m	5/14/2010	134	2010	fed	crossed	2010HE101	2010HD749	3499136	5413229	0.903448276	8/21/2010	99	27	9/17/2010	126	completed	36	23.10.2010	162	3528299.5	5417304.5	29447	126.4	9.120147042
HF-64730	m	5/16/2010	136	2010	fed	not_crossed	2010HD749	2010HD749	3499136	5413229	0.903448276	8/11/2010	87	32	9/12/2010	119	completed	4	16.09.2010	123	3499078.75	5411967	1263	137.6	-11.94220338
HF-64731	m	5/16/2010	136	2010	fed	not_crossed	2010HD749	2010HD749	3499136	5413229	0.903448276	8/21/2010	97	0	8/21/2010	95.5	completed	10.5	31.08.2010	106	3497808.25	5408051	5346	135.7	4.057796621
HF-64761	m	5/28/2010	148	2010	fed	not_crossed	2010RE047	2010RE047	3519150	5416186	0.819411765	8/24/2010	88	0	8/24/2010	85.5	completed	7.5	01.09.2010	93	3522524.25	5415989.5	3380	129.7	17.35132225
HF-64762	f	5/24/2010	144	2010	unfed	crossed	2010RE047	2010RE048	3519038	5417090	0.990804598	8/4/2010	72	15	8/19/2010	87	NA	NA	NA	NA	NA	NA	NA	139.6	4.426621411
HF-64763	m	5/24/2010	144	2010	unfed	crossed	2010RE047	2010RE048	3519038	5417090	0.990804598	8/11/2010	79	8	8/19/2010	87	completed	12	31.08.2010	99	3516445.5	5416345	2697	141.5	0.857796621
HF-64764	m	5/24/2010	144	2010	fed	not_crossed	2010RE047	2010RE047	3519150	5416186	0.909659091	7/29/2010	66	19	8/17/2010	85	completed	24	10.09.2010	109	3523834	5419256.5	5601	135.7	0.657796621
HF-64766	m	5/22/2010	142	2010	fed	crossed	2010RE048	2010RE047	3519150	5416186	0.829824561	8/5/2010	75	136	12/19/2010	211	NA	NA	NA	NA	NA	NA	NA	146.6	-1.079852958
HF-64767	m	5/23/2010	143	2010	fed	crossed	2010RE048	2010RE047	3519150	5416186	0.819411765	8/19/2010	88	0	8/19/2010	87	completed	175	10.02.2011	262	3517413.5	5427608.5	11554	146.5	8.157796621
HF-64772	f	5/24/2010	144	2010	unfed	not_crossed	2010MA061	2010MA061	3519973	5420215	0.829824561	8/18/2010	86	1	8/19/2010	87	completed	18	06.09.2010	105	3523934	5419273	4071	152.7	12.12014704
HF-64773	m	5/26/2010	146	2010	unfed	crossed	2010LB045	2010MA061	3519973	5420215	0.857058824	8/18/2010	84	1	8/19/2010	85	NA	NA	NA	NA	NA	NA	NA	134.4	5.320147042
HF-64775	f	5/21/2010	141	2010	fed	crossed	2010RW007	2010BI006	3508654	5425805	0.946242775	9/9/2010	111	45	10/24/2010	156	NA	NA	NA	NA	NA	NA	NA	137	6.957796621
HF-64781	f	5/21/2010	141	2010	unfed	not_crossed	2010RW007	2010RW007	3495303	5421141	0.946242775	9/12/2010	114	19	10/1/2010	133	completed	5	06.10.2010	138	3486415.25	5422341.5	8968	108.5	13.2760231
HF-64782	m	5/20/2010	140	2010	unfed	not_crossed	2010RW007	2010RW007	3495303	5421141	0.946242775	9/12/2010	115	195	3/26/2011	310	NA	NA	NA	NA	NA	NA	NA	118.2	14.68249746
HF-64783	m	5/23/2010	143	2010	unfed	not_crossed	2010RW007	2010RW007	3495303	5421141	0.840697674	9/24/2010	124	0	9/24/2010	123	completed	1	25.09.2010	124	3491348.75	5423015.5	4376	113.6	20.33837352
HF-64785	f	5/27/2010	147	2010	fed	crossed	2010SC002	2010EN098	3500007	5418145	0.840697674	8/11/2010	76	9	8/20/2010	85	NA	NA	NA	NA	NA	NA	NA	135.2	9.488971832
HF-64786	m	5/28/2010	148	2010	fed	not_crossed	2010EN098	2010EN098	3500007	5418145	0.840697674	8/18/2010	82	10	8/28/2010	92	completed	8	05.09.2010	100	3498161.75	5422542	4768	140.6	-7.211028168
HF-64787	m	5/24/2010	144	2010	fed	crossed	2010SC002	2010EN098	3500007	5418145	0.874853801	8/11/2010	79	12	8/23/2010	91	completed	5	28.08.2010	96	3495298.5	5421184.5	5604	162.9	7.807198306
HF-64788	m	5/23/2010	143	2010	fed	not_crossed	2010EN098	2010EN098	3500007	5418145	0.993063584	8/11/2010	80	17	8/28/2010	97	completed	5	02.09.2010	102	3501140.25	5413893.5	4400	136.6	-9.723976905
HF-64789	m	5/23/2010	143	2010	fed	not_crossed	2010EN098	2010EN098	3500007	5418145	0.993063584	8/11/2010	80	17	8/28/2010	97	completed	6	03.09.2010	103	3506603.25	5414179.5	7696	145.5	-9.692801694
HF-64790	f	5/25/2010	145	2010	unfed	not_crossed	2010SC002	2010SC002	3503696	5416123	0.993063584	8/31/2010	98	0	8/31/2010	95	completed	3	03.09.2010	98	3503548.25	5409476.5	6648	132.7	18.21367267
HF-64791	m	5/24/2010	144	2010	unfed	not_crossed	2010SC002	2010SC002	3503696	5416123	0.964942529	8/21/2010	89	0	8/21/2010	87.5	completed	4.5	26.08.2010	92	3497180	5407896.5	10494	134.3	-18.91102817
HF-64793	f	5/22/2010	142	2010	unfed	crossed	2010EN098	2010SC002	3503696	5416123	0.815606936	8/16/2010	86	9	8/25/2010	95	NA	NA	NA	NA	NA	NA	NA	136	10.85779662
HF-64828	f	5/29/2010	149	2010	unfed	not_crossed	2010KS005	2010KS005	3505586	5427559	0.704624277	7/31/2010	63	29	8/29/2010	92	completed	27	25.09.2010	119	3499879.5	5424668.5	6397	160.9	20.15132225
HF-64829	f	5/29/2010	149	2010	unfed	not_crossed	2010KS005	2010KS005	3505586	5427559	0.704624277	7/31/2010	63	29	8/29/2010	92	NA	NA	NA	NA	NA	NA	NA	154.2	-12.81102817
HF-64830	m	5/31/2010	151	2010	unfed	not_crossed	2010KS005	2010KS005	3505586	5427559	0.704624277	7/31/2010	61	20	8/20/2010	81	NA	NA	NA	NA	NA	NA	NA	159.5	-28.14867775
HF-64844	f	6/8/2010	159	2010	unfed	not_crossed	2010SE050	2010SE050	3501043	5425899	0.704624277	7/25/2010	47	23	8/17/2010	70	NA	NA	NA	NA	NA	NA	NA	125.5	1.151322253
HF-64845	f	6/10/2010	161	2010	unfed	not_crossed	2010SE050	2010SE050	3501043	5425899	0.725142857	9/5/2010	87	33	10/8/2010	120	NA	NA	NA	NA	NA	NA	NA	133.1	-6.942203379
HF-64846	f	6/8/2010	159	2010	unfed	not_crossed	2010SE050	2010SE050	3501043	5425899	0.734682081	8/2/2010	55	49	9/20/2010	104	NA	NA	NA	NA	NA	NA	NA	138	12.35779662
HF-64855	f	7/1/2010	182	2010	unfed	not_crossed	2010GB089	2010GB089	3520508	5431123	0.734682081	10/1/2010	92	6	10/7/2010	98	completed	5	12.10.2010	103	3515450.5	5429770	5235	148.2	1.533095779
HF-64856	f	7/2/2010	183	2010	unfed	not_crossed	2010GB089	2010GB089	3520508	5431123	0.862146893	9/28/2010	88	11	10/9/2010	99	NA	NA	NA	NA	NA	NA	NA	154	-4.979852958
HF-64857	f	7/1/2010	182	2010	unfed	not_crossed	2010GB089	2010GB089	3520508	5431123	0.580232558	9/23/2010	84	30	10/23/2010	114	NA	NA	NA	NA	NA	NA	NA	156.9	8.282497463
HF-64887	f	5/7/2011	127	2011	unfed	not_crossed	2011RE045	2011RE045	3518664	5416877	0.580232558	8/12/2011	97	26	9/7/2011	123	completed	12	19.09.2011	135	3519218.5	5439036	22166	NA	NA
HF-64888	f	5/5/2011	125	2011	unfed	not_crossed	2011RE045	2011RE045	3518664	5416877	0.580232558	8/15/2011	102	0	8/15/2011	100.5	completed	15.5	31.08.2011	116	3520640.25	5420541	4163	NA	NA
HF-64935	m	5/11/2011	131	2011	fed	crossed	2011GB083	2011RE047	3519150	5416186	0.843352601	8/15/2011	96	3	8/18/2011	99	completed	6	24.08.2011	105	3526610.25	5416600	7472	153.3	-0.617502537
HF-64936	m	5/12/2011	132	2011	fed	not_crossed	2011RE047	2011RE047	3519150	5416186	0.958235294	8/23/2011	103	35	9/27/2011	138	completed	9	06.10.2011	147	3521032.75	5416022	1890	148.5	11.68249746
HF-64937	f	5/11/2011	131	2011	fed	not_crossed	2011RE047	2011RE047	3519150	5416186	0.958235294	8/8/2011	89	1	8/9/2011	90	completed	10	19.08.2011	100	3520524.5	5425062	8982	135.1	14.68897183
HF-64938	m	5/11/2011	131	2011	fed	crossed	2011GB083	2011RE047	3519150	5416186	1	8/16/2011	97	2	8/18/2011	99	NA	NA	NA	NA	NA	NA	NA	159.3	6.357796621
HF-64941	f	5/9/2011	129	2011	unfed	not_crossed	2011LB046	2011LB046	3517500	5418180	1	6/23/2011	46	0	6/23/2011	45	NA	NA	NA	NA	NA	NA	NA	152.2	-4.935729011
HF-64942	f	5/5/2011	125	2011	fed	not_crossed	2011RE048	2011RE048	3519038	5417090	0.852840909	8/23/2011	110	0	8/23/2011	108	NA	NA	NA	NA	NA	NA	NA	139.5	13.35132225
HF-64943	f	5/9/2011	129	2011	fed	crossed	2011GB080	2011RE048	3519038	5417090	0.857627119	6/13/2011	36	0	6/13/2011	33.5	NA	NA	NA	NA	NA	NA	NA	134.5	14.55779662
HF-64944	f	5/5/2011	125	2011	fed	crossed	2011GB080	2011RE048	3519038	5417090	0.779190751	8/12/2011	99	0	8/12/2011	97.5	completed	20.5	01.09.2011	118	3521128.5	5416800.5	2110	137.2	27.45779662
HF-64946	m	5/11/2011	131	2011	unfed	not_crossed	2011GB083	2011GB083	3521604	5430683	0.844508671	8/10/2011	91	13	8/23/2011	104	NA	NA	NA	NA	NA	NA	NA	137	4.057796621
HF-64999	f	5/13/2011	133	2011	fed	crossed	2011AL042	2011AL040	3516948	5413576	0.844508671	8/2/2011	81	36	9/7/2011	117	completed	5	12.09.2011	122	3506578.75	5409638.5	11092	141.9	19.33837352
HF-65002	f	5/11/2011	131	2011	unfed	crossed	2011AL040	2011AL042	3517496	5414105	0.844508671	8/9/2011	90	3	8/12/2011	93	completed	32	13.09.2011	125	3511042.75	5416628	6929	130.1	4.026621411
HF-65007	f	5/14/2011	134	2011	fed	not_crossed	2011GB087	2011GB087	3520846	5431510	0.995348837	7/1/2011	49	0	7/1/2011	44.5	NA	NA	NA	NA	NA	NA	NA	127	-1.911028168
HF-65012	f	5/17/2011	137	2011	unfed	not_crossed	2011TA111	2011TA111	3509777	5421626	0.995348837	9/10/2011	116	0	9/10/2011	114	completed	5	15.09.2011	119	3517541.5	5426310.5	9068	NA	NA
HF-65013	f	5/15/2011	135	2011	unfed	not_crossed	2011TA111	2011TA111	3509777	5421626	0.967251462	8/21/2011	98	19	9/9/2011	117	NA	NA	NA	NA	NA	NA	NA	NA	NA
HF-65015	f	5/14/2011	134	2011	unfed	not_crossed	2011TA111	2011TA111	3509777	5421626	0.873410405	9/9/2011	118	0	9/9/2011	116.5	completed	7.5	16.09.2011	124	3503006	5427899.5	9231	NA	NA
HF-65053	m	5/13/2011	133	2011	unfed	not_crossed	2011NW053	2011NW053	3517379	5419540	0.873410405	8/7/2011	86	31	9/7/2011	117	completed	27	04.10.2011	144	3516640.25	5420107	931	143	-7.442203379
HF-65056	m	5/22/2011	142	2011	unfed	not_crossed	2011AF007	2011AF007	3525307	5419997	0.816763006	9/8/2011	109	3	9/11/2011	112	completed	8	19.09.2011	120	3528695.5	5418615.5	3659	NA	NA
HF-65057	m	5/23/2011	143	2011	unfed	not_crossed	2011AF007	2011AF007	3525307	5419997	0.816763006	8/15/2011	84	27	9/11/2011	111	completed	125	14.01.2012	236	3524528	5419285.5	1055	NA	NA
HF-65058	m	5/14/2011	134	2011	fed	not_crossed	2011GB081	2011GB081	3521494	5431004	0.816763006	7/1/2011	49	0	7/1/2011	46	NA	NA	NA	NA	NA	NA	NA	139	-11.99807943
HF-65059	f	5/15/2011	135	2011	fed	crossed	2011KS019	2011GB081	3521494	5431004	0.816763006	7/31/2011	77	10	8/10/2011	87	completed	8	18.08.2011	95	3520897.25	5423967.5	7062	138.9	24.05779662
HF-65060	f	5/16/2011	136	2011	fed	crossed	2011KS019	2011GB081	3521494	5431004	0.566666667	7/31/2011	76	10	8/10/2011	86	NA	NA	NA	NA	NA	NA	NA	132.2	-8.655152115
HF-65063	f	5/19/2011	139	2011	unfed	not_crossed	2011HP047	2011HP047	3517410	5427646	0.566666667	8/14/2011	87	41	9/24/2011	128	completed	12	06.10.2011	140	3529706.75	5427214	12304	146.5	11.25779662
HF-65064	m	5/21/2011	141	2011	unfed	not_crossed	2011HP047	2011HP047	3517410	5427646	0.566666667	8/14/2011	85	54	10/7/2011	139	completed	10	17.10.2011	149	3518908	5407304.5	20397	142.1	-20.5045538
HF-65069	m	5/15/2011	135	2011	unfed	not_crossed	2011KS019	2011KS019	3504513	5426560	0.854857143	6/19/2011	36	0	6/19/2011	33.5	NA	NA	NA	NA	NA	NA	NA	116	0.057796621
HF-65071	m	5/15/2011	135	2011	unfed	crossed	2011MG108	2011LB044	3517227	5416882	0.854857143	8/5/2011	82	8	8/13/2011	90	NA	NA	NA	NA	NA	NA	NA	145.9	-10.84220338
HF-65072	f	5/14/2011	134	2011	unfed	crossed	2011MG108	2011LB044	3517227	5416882	0.854857143	8/17/2011	95	18	9/4/2011	113	completed	11	15.09.2011	124	3521504.25	5429663.5	13478	149	-19.74220338
HF-65073	f	5/16/2011	136	2011	unfed	not_crossed	2011LB044	2011LB044	3517227	5416882	0.882080925	8/21/2011	97	14	9/4/2011	111	completed	9	13.09.2011	120	3519122.75	5423732	7107	126	4.782497463
HF-65074	f	5/17/2011	137	2011	unfed	not_crossed	2011VA053	2011VA053	3498709	5421812	0.868604651	7/24/2011	68	46	9/8/2011	114	completed	23	01.10.2011	137	3496582.25	5429134.5	7625	142	-1.911028168
HF-65075	f	5/14/2011	134	2011	unfed	not_crossed	2011VA053	2011VA053	3498709	5421812	0.958381503	8/24/2011	102	42	10/5/2011	144	completed	1	06.10.2011	145	3509009	5418490	10822	158.2	-21.67985296
HF-65076	f	5/18/2011	138	2011	unfed	not_crossed	2011VA053	2011VA053	3498709	5421812	0.958381503	7/30/2011	73	42	9/10/2011	115	completed	8	18.09.2011	123	3502595.25	5411710.5	10823	141.4	1.133095779
HF-65077	m	5/14/2011	134	2011	fed	not_crossed	2011MG108	2011MG108	3508033	5417133	0.958381503	8/30/2011	108	36	10/5/2011	144	NA	NA	NA	NA	NA	NA	NA	136.1	20.58897183
HF-65079	m	5/18/2011	138	2011	fed	crossed	2011LB044	2011MG108	3508033	5417133	0.917045455	8/17/2011	91	20	9/6/2011	111	completed	6	12.09.2011	117	3508295.25	5416700.5	506	138.8	-15.34867775
HF-65083	f	5/18/2011	138	2011	fed	not_crossed	2011MU103	2011MU103	3506267	5412936	0.917045455	7/21/2011	64	24	8/14/2011	88	completed	24	07.09.2011	112	3520201.5	5434024	25276	138.6	-5.811028168
HF-65085	f	5/17/2011	137	2011	unfed	not_crossed	2011SB003	2011SB003	3502535	5416486	0.917045455	8/19/2011	94	0	8/19/2011	92	NA	NA	NA	NA	NA	NA	NA	137	-2.848677747
HF-65088	m	5/20/2011	140	2011	unfed	not_crossed	2011SC009	2011SC009	3503112	5415865	0.550581395	8/15/2011	87	0	8/15/2011	85	completed	64	18.10.2011	149	3502573.5	5410578.5	5314	138.8	16.05132225
HF-65089	f	5/22/2011	142	2011	unfed	crossed	2011SC008	2011SC009	3503112	5415865	0.550581395	8/11/2011	81	23	9/3/2011	104	completed	8	11.09.2011	112	3491817.75	5420134.5	12074	146.1	19.42014704
HF-65090	m	5/22/2011	142	2011	unfed	crossed	2011SC008	2011SC009	3503112	5415865	0.550581395	8/23/2011	93	0	8/23/2011	89	NA	NA	NA	NA	NA	NA	NA	144.4	10.38249746
HF-65091	m	5/20/2011	140	2011	fed	crossed	2011SC009	2011SC008	3503413	5415778	0.666091954	8/31/2011	103	6	9/6/2011	109	completed	44	20.10.2011	153	3480960.75	5431575	27453	152	-7.317502537
HF-65092	f	5/20/2011	140	2011	fed	crossed	2011SC009	2011SC008	3503413	5415778	0.666091954	9/2/2011	105	2	9/4/2011	107	completed	105	18.12.2011	212	3484049.25	5439766.5	30829	145.2	-10.94220338
HF-65093	f	5/22/2011	142	2011	fed	not_crossed	2011SC008	2011SC008	3503413	5415778	0.74127907	8/15/2011	85	24	9/8/2011	109	completed	20	28.09.2011	129	3513945.5	5414520.5	10607	144.9	-1.848677747
HF-65095	m	5/21/2011	141	2011	unfed	not_crossed	2011FR003	2011FR003	3511814	5422281	0.812138728	6/24/2011	35	0	6/24/2011	32	NA	NA	NA	NA	NA	NA	NA	161	-6.711028168
HF-65111	f	5/18/2011	138	2011	unfed	not_crossed	2011HI729	2011HI729	3500366	5410624	0.761271676	8/25/2011	99	0	8/25/2011	98.5	completed	9.5	04.09.2011	108	3502854.25	5417583.5	7391	158	-25.81750254
HF-65112	f	5/18/2011	138	2011	unfed	not_crossed	2011HI729	2011HI729	3500366	5410624	0.761271676	8/15/2011	89	10	8/25/2011	99	NA	NA	NA	NA	NA	NA	NA	156	21.12014704
HF-65113	m	5/21/2011	141	2011	unfed	not_crossed	2011HI729	2011HI729	3500366	5410624	0.884705882	8/28/2011	99	0	8/28/2011	95	completed	27	24.09.2011	122	3486283.5	5413923.5	14464	156.5	1.213672674
HF-65114	f	5/16/2011	136	2011	unfed	not_crossed	2011HI729	2011HI729	3500366	5410624	0.884705882	8/12/2011	88	16	8/28/2011	104	completed	18	15.09.2011	122	3498146.75	5413703	3795	167	-28.67985296
HF-65117	m	5/22/2011	142	2011	fed	not_crossed	2011AL041	2011AL041	3517360	5414310	0.884705882	8/24/2011	94	0	8/24/2011	92.5	completed	33.5	26.09.2011	126	3526844.25	5407459.5	11700	148.4	2.951322253
HF-65118	f	5/22/2011	142	2011	fed	not_crossed	2011AL041	2011AL041	3517360	5414310	0.854857143	8/24/2011	94	18	9/11/2011	112	completed	17	28.09.2011	129	3504659.5	5415762.5	12783	131.7	-16.97985296
HF-65141	f	5/20/2011	140	2011	unfed	not_crossed	2011SO072	2011SO072	3501574	5411942	0.78265896	8/8/2011	80	29	9/6/2011	109	NA	NA	NA	NA	NA	NA	NA	144	-10.67985296
HF-65142	m	5/17/2011	137	2011	unfed	not_crossed	2011SO733	2011SO733	3502695	5411767	0.965142857	8/27/2011	102	0	8/27/2011	97.5	completed	36.5	02.10.2011	134	3510952.25	5412665.5	8306	153.5	8.657796621
HF-65143	m	5/18/2011	138	2011	unfed	not_crossed	2011SO733	2011SO733	3502695	5411767	0.965142857	8/24/2011	98	0	8/24/2011	95	completed	39	02.10.2011	134	3525993	5416370.5	23748	135	-13.41102817
HF-65145	f	5/17/2011	137	2011	unfed	not_crossed	2011HO100	2011HO100	3501437	5409595	0.854857143	8/15/2011	90	25	9/9/2011	115	completed	9	18.09.2011	124	3504048.5	5406425.5	4107	136	14.12014704
HF-65146	m	5/14/2011	134	2011	unfed	not_crossed	2011EN099	2011EN099	3499985	5419149	0.965142857	8/11/2011	89	95	11/14/2011	184	NA	NA	NA	NA	NA	NA	NA	138	-4.599276063
HF-65147	f	5/14/2011	134	2011	unfed	not_crossed	2011EN099	2011EN099	3499985	5419149	0.909659091	8/11/2011	89	30	9/10/2011	119	completed	10	20.09.2011	129	3506055.5	5431612.5	13863	161	-11.75515212
HF-65148	m	5/18/2011	138	2011	unfed	crossed	2011MU103	2011EN099	3499985	5419149	0.909659091	8/25/2011	99	14	9/8/2011	113	completed	16	24.09.2011	129	3476196	5420534	23829	120	-0.0045538
HF-65149	m	5/29/2011	149	2011	fed	crossed	2011LB047	2011AF006	3523927	5419266	0.829824561	8/15/2011	78	133	12/26/2011	211	completed	56	20.02.2012	267	3525511.5	5419347	1587	148.8	27.12014704
HF-65150	f	5/26/2011	146	2011	fed	not_crossed	2011AF006	2011AF006	3523927	5419266	0.829824561	8/15/2011	81	21	9/5/2011	102	completed	8	13.09.2011	110	3522012.75	5417192	2822	161	16.05779662
HF-65151	f	5/28/2011	148	2011	fed	crossed	2011LB047	2011AF006	3523927	5419266	0.875722543	8/3/2011	67	57	9/29/2011	124	completed	17	16.10.2011	141	3526647	5410433	9242	126.1	-27.64220338
HF-65153	m	5/28/2011	148	2011	unfed	not_crossed	2011LB047	2011LB047	3517768	5417831	0.946242775	8/12/2011	76	62	10/13/2011	138	NA	NA	NA	NA	NA	NA	NA	111.2	-2.842203379
HF-65154	m	5/27/2011	147	2011	unfed	crossed	2011AF006	2011LB047	3517768	5417831	0.875722543	8/31/2011	96	27	9/27/2011	123	completed	8	05.10.2011	131	3519488	5421395.5	3958	112.7	5.326621411
HF-65156	f	5/25/2011	145	2011	unfed	crossed	2011VA021	2011SC105	3505180	5416718	0.946242775	7/14/2011	51	0	7/14/2011	49.5	NA	NA	NA	NA	NA	NA	NA	143.8	11.12014704
HF-65157	f	5/25/2011	145	2011	unfed	not_crossed	2011SC105	2011SC105	3505180	5416718	0.946242775	8/10/2011	77	33	9/12/2011	110	completed	37	19.10.2011	147	3479876.5	5426452.5	27111	142	24.85779662
HF-65158	m	5/25/2011	145	2011	unfed	not_crossed	2011SC105	2011SC105	3505180	5416718	0.946242775	8/8/2011	75	19	8/27/2011	94	NA	NA	NA	NA	NA	NA	NA	154	-3.542203379
HF-65159	f	5/27/2011	147	2011	fed	not_crossed	2011OT099	2011OT099	3514249	5431906	0.946242775	8/13/2011	78	29	9/11/2011	107	completed	24	05.10.2011	131	3514159.75	5439508.5	7603	131	-11.8045538
HF-65160	m	5/30/2011	150	2011	fed	crossed	2011BE003	2011OT099	3514249	5431906	0.990751445	8/22/2011	84	190	2/28/2012	274	NA	NA	NA	NA	NA	NA	NA	151.8	-37.21102817
HF-65161	f	5/27/2011	147	2011	fed	crossed	2011EN098	2011OT096	3515938	5431458	0.990751445	8/14/2011	79	28	9/11/2011	107	completed	10	21.09.2011	117	3520403.5	5422370.5	10125	150.3	-0.279852958
HF-65162	m	5/27/2011	147	2011	fed	crossed	2011EN098	2011OT096	3515938	5431458	0.990751445	9/7/2011	103	12	9/19/2011	115	NA	NA	NA	NA	NA	NA	NA	152.5	-3.542203379
HF-65163	f	5/31/2011	151	2011	fed	not_crossed	2011OT096	2011OT096	3515938	5431458	0.990751445	8/14/2011	75	24	9/7/2011	99	completed	166	20.02.2012	265	3518503.75	5437325.5	6404	135.6	-2.911028168
HF-65166	m	5/27/2011	147	2011	unfed	not_crossed	2011EN098	2011EN098	3500007	5418145	0.895882353	7/1/2011	36	0	7/1/2011	32.5	NA	NA	NA	NA	NA	NA	NA	122.9	-6.192801694
HF-65167	f	5/27/2011	147	2011	unfed	crossed	2011OT096	2011EN098	3500007	5418145	0.913872832	9/11/2011	107	0	9/11/2011	106.5	completed	5.5	17.09.2011	112	3512830.25	5421996.5	13389	134.9	-3.848677747
HF-65168	m	5/27/2011	147	2011	unfed	crossed	2011OT096	2011EN098	3500007	5418145	0.913872832	7/26/2011	61	0	7/26/2011	57.5	NA	NA	NA	NA	NA	NA	NA	129.2	6.988971832
HF-65177	f	5/22/2011	142	2011	unfed	not_crossed	2011PO061	2011PO061	3521381	5419196	0.913872832	8/18/2011	88	0	8/18/2011	86.5	completed	5.5	23.08.2011	92	3517656.25	5420927	4107	150.1	-3.779852958
HF-65198	f	6/1/2011	152	2011	unfed	not_crossed	2011VA020	2011VA020	3499373	5420965	0.931176471	8/16/2011	76	80	11/4/2011	156	completed	107	19.02.2012	263	3498825.75	5411419.5	9561	141.2	-8.692801694
HF-65213	f	6/1/2011	152	2011	unfed	not_crossed	2011SO071	2011SO071	3501986	5411641	0.931176471	8/20/2011	80	8	8/28/2011	88	completed	113	19.12.2011	201	3489365	5397557	18912	153.5	6.457796621
HF-65214	m	6/4/2011	155	2011	unfed	not_crossed	2011SO071	2011SO071	3501986	5411641	0.931176471	8/25/2011	82	0	8/25/2011	79.5	completed	2.5	27.08.2011	82	3504643.25	5418293.5	7164	153.6	11.2760231
HF-65217	f	6/11/2011	162	2011	fed	not_crossed	2011SC002	2011SC002	3503696	5416123	0.642941176	8/23/2011	73	0	8/23/2011	71	NA	NA	NA	NA	NA	NA	NA	139.7	-4.786327326
HF-65219	f	6/11/2011	162	2011	unfed	crossed	2011SC002	2011RW007	3495303	5421141	0.642941176	8/13/2011	63	56	10/8/2011	119	NA	NA	NA	NA	NA	NA	NA	165.4	13.15132225
HF-65220	m	6/11/2011	162	2011	unfed	not_crossed	2011RW007	2011RW007	3495303	5421141	0.642941176	8/13/2011	63	64	10/16/2011	127	completed	28	13.11.2011	155	3501007.75	5416627.5	7274	144.3	-2.612224799
HF-65221	f	6/11/2011	162	2011	unfed	crossed	2011SC002	2011RW007	3495303	5421141	0.642941176	8/17/2011	67	23	9/9/2011	90	NA	NA	NA	NA	NA	NA	NA	146.6	1.757796621
